# Supplementary material for: Assessment of Data Capture Conditions Effect on Reverse Electrodialysis Process Using a DC Electronic Load
Source: MDPI journal article supplement (doi:10.3390/en16217282), 2023-10-26
Supplement: s1 [file s1]

## Assessment of data capture conditions effect on reverse electrodialysis process using a DC electronic load

Jesus Nahum Hernandez-Perez<sup>1,3</sup>, Marco Antonio Hernández-Nochebuena<sup>2</sup>, Jéssica González-Scott<sup>1</sup>, Rosa de Guadalupe González-Huerta<sup>1</sup>, José Luis Reyes-Rodríguez<sup>1</sup>, Alfredo Ortiz<sup>3\*</sup>

<sup>1</sup>*Instituto Politécnico Nacional – ESIQIE, Laboratorio de Electroquímica, UPALM, 07738 CDMX, Mexico.*

<sup>2</sup>*Department of Chemical and Biomolecular Engineering, Universidad de Cantabria, Av. Los Castros 46, 39005 Santander, Spain*

<sup>3</sup>*Instituto Mexicano del Transporte, Pedro Escobedo, 76703 QRO., Mexico.*

Corresponding author: [alfredo.ortizsainz@unican.es](mailto:alfredo.ortizsainz@unican.es)

### Support Materials

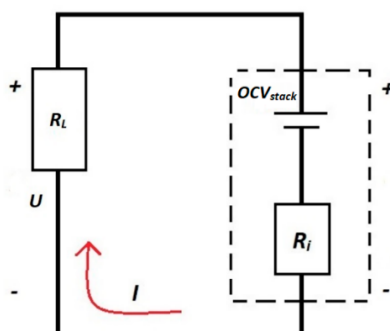

**Figure S1.** Equivalent circuit of RED process.

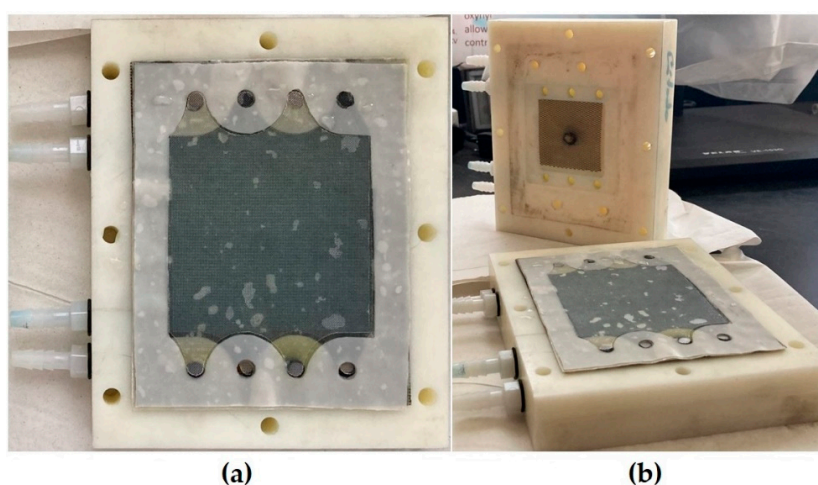

**Figure S2.** RED prototype (RU1) (a) Endplate and stack design, (b) Prototype before assembly.

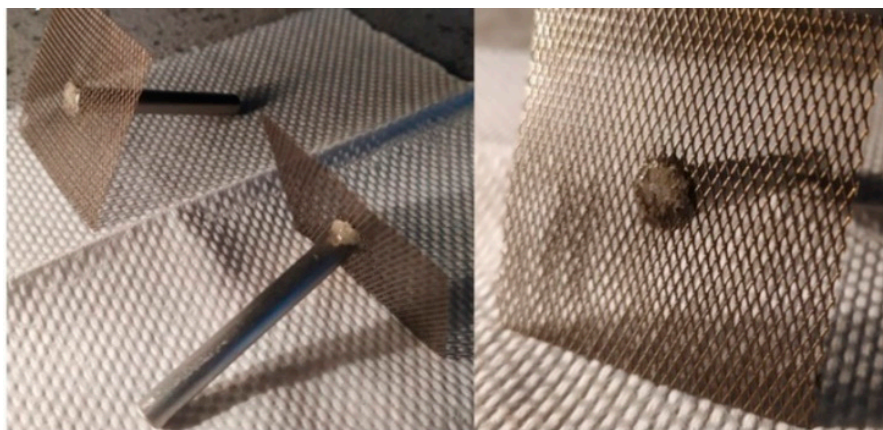

**Figure S3.** In-house built Pt/Ti mesh electrodes used for RED experiments.

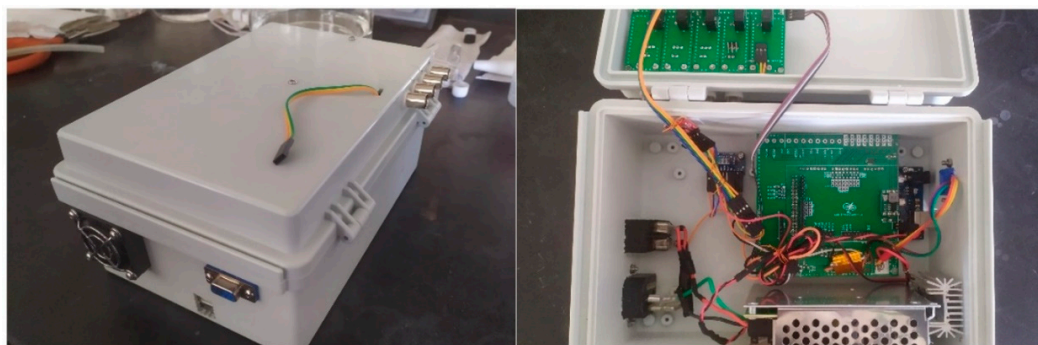

**Figure S4.** DC electronic load module (DCELM).

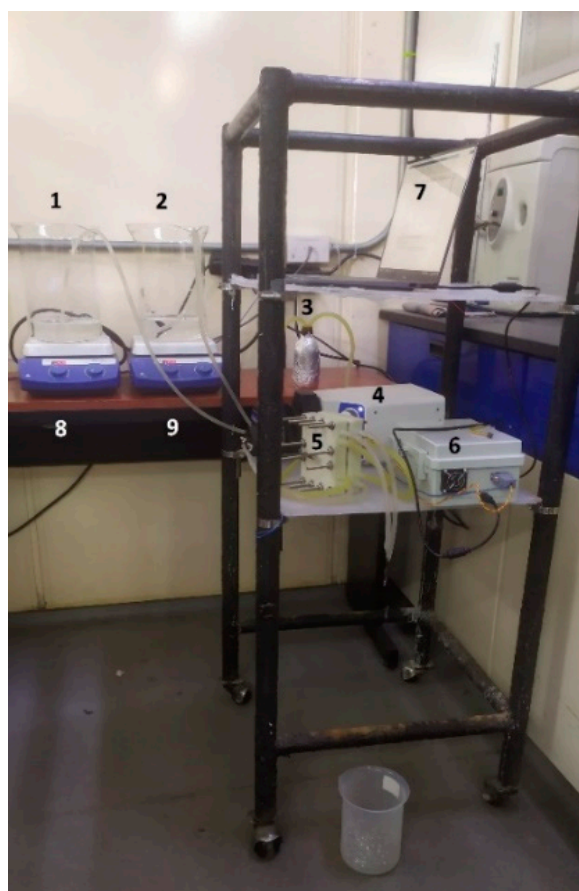

**Figure S5.** Lab scale experimental setup of the RED test bench. Components of test bench:

1. Low concentration (LC) solution container, 2. High concentration (HC) solution container, 3. Electrode rinse solution (ERS) container, 4. Double head peristaltic pump, 5. RED prototype (RU1), 6. DC electronic load module (DCELM), 7. MATLAB® interface, 8. Hot plate for LC solution and 9. Hot plate for HC solution.

**Table S1.** Properties of IEM used for RED experiments

| IEM properties                       | Fuji Type 10 |     |
|--------------------------------------|--------------|-----|
|                                      | AEM          | CEM |
| Thickness dry ( $\mu\text{m}$ )      | 125          | 135 |
| Permselectivity (%)                  | 95           | 99  |
| Resistance ( $\Omega \text{ cm}^2$ ) | 1.7          | 2.0 |
| Reinforcement                        | Polyolefin   |     |

**Table S2.** Parameters of the MOSFET IRFZ44N.

| Parameter                               | Value  |
|-----------------------------------------|--------|
| $V_{\text{gs}} (\text{on})$             | 10.0 V |
| $V_{\text{gs}} (\text{th})$             | 2.1 V  |
| $I_{\text{D}} (\text{on}) \text{ max.}$ | 25 A   |
